# Supplementary material for: Contrasting the excited state properties of different conformers of trans- and cis-2,2′-bipyridine oligomers in the gas phase
Source: Royal Society of Chemistry journal article supplement (doi:10.1039/d3cp05313j), 2023-12-14
Supplement: d3cp05313j2.pdf [file d3cp05313j2.pdf]

**Supplementary Materials**

**Contrasting the excited state properties of  
different conformers of *trans*- and *cis*- 2,  
2'-Bipyridine oligomers in the gas phase**

Palak Mandal and Aditya N. Panda\*

*Department of Chemistry, Indian Institute of Technology Guwahati, 781039, India*

E-mail: [anp@iitg.ac.in](mailto:anp@iitg.ac.in)

# List of Tables

|    |                                                                                                                                                                                                                                                                                                                                 |     |
|----|---------------------------------------------------------------------------------------------------------------------------------------------------------------------------------------------------------------------------------------------------------------------------------------------------------------------------------|-----|
| S1 | Energies (in eV) of ground state optimized structures of all the oligomers at B3LYP-D3/def2-SVPD level . . . . .                                                                                                                                                                                                                | S7  |
| S2 | Calculated dihedral angles ( $\phi_{1-7}$ ) of <b>(BPY)<sub>2</sub></b> - <b>(BPY)<sub>4</sub></b> for <i>trans</i> - structures of <i>o</i> - conformer at B3LYP-D3/def2-SVPD level . . . . .                                                                                                                                  | S7  |
| S3 | Calculated dihedral angles ( $\phi_{1-7}$ ) of <b>(BPY)<sub>2</sub></b> - <b>(BPY)<sub>4</sub></b> for <i>trans</i> - structures of <i>m</i> - and <i>p</i> - conformers at B3LYP-D3/def2-SVPD level . . . . .                                                                                                                  | S8  |
| S4 | Calculated dihedral angles ( $\phi_{1-7}$ ) of <b>(BPY)<sub>2</sub></b> - <b>(BPY)<sub>4</sub></b> for <i>cis</i> - structures of <i>o</i> - conformer at B3LYP-D3/def2-SVPD level . . . . .                                                                                                                                    | S8  |
| S5 | Calculated dihedral angles ( $\phi_{1-7}$ ) of <b>(BPY)<sub>2</sub></b> - <b>(BPY)<sub>4</sub></b> for <i>cis</i> - structures of <i>m</i> - and <i>p</i> - conformers at B3LYP-D3/def2-SVPD level . . . . .                                                                                                                    | S8  |
| S6 | Vertical excitation energies ( $E_g$ ), oscillator strengths ( $f_{osc}$ ) and the rotatory strengths ( $R$ in $10^{-40}$ erg-esu-cm/Gauss) of first sixteen excited states for three conformers of <i>trans</i> - and <i>cis</i> - <b>(BPY)<sub>2</sub></b> obtained at RI-ADC(2)/def2-TZVPD level . . . . .                   | S9  |
| S7 | Vertical excitation energies ( $E_g$ ), oscillator strengths ( $f_{osc}$ ) and the rotatory strengths ( $R$ in $10^{-40}$ erg-esu-cm/Gauss) of first sixteen excited states for three conformers of <i>trans</i> - and <i>cis</i> - <b>(BPY)<sub>3</sub></b> obtained at RI-ADC(2)/def2-TZVPD level . . . . .                   | S10 |
| S8 | Vertical excitation energies ( $E_g$ ), oscillator strengths ( $f_{osc}$ ) and the rotatory strengths ( $R$ in $10^{-40}$ erg-esu-cm/Gauss) of first sixteen excited states for cy- <i>o</i> - and cy- <i>p</i> - conformers of <i>cis</i> - <b>(BPY)<sub>3</sub></b> obtained at RI-ADC(2)/def2-TZVPD level . . . . .          | S11 |
| S9 | $E_g$ , $f_{osc}$ , Rotatory Strengths ( $R$ in erg-esu-cm/Gauss), $ \mu $ (in esu-cm), $ m $ (in erg-G <sup>-1</sup> ), $\cos \theta$ , $g_{CD}$ , and $ m / \mu $ values of the first sixteen excited states of <i>trans</i> - <b>(BPY)<sub>4</sub></b> for three conformers obtained at RI-ADC(2)/def2-TZVPD level . . . . . | S12 |

|     |                                                                                                                                                                                                                                                                                                                       |     |
|-----|-----------------------------------------------------------------------------------------------------------------------------------------------------------------------------------------------------------------------------------------------------------------------------------------------------------------------|-----|
| S10 | $E_g$ , $f_{osc}$ , Rotatory Strengths ( $R$ in erg·esu·cm/Gauss), $ \mu $ (in esu·cm), $ m $ (in erg·G <sup>-1</sup> ), $\cos \theta$ , $g_{CD}$ , and $ m / \mu $ values of the first sixteen excited states of <b><i>cis</i>-(BPY)<sub>4</sub></b> for three conformers obtained at RI-ADC(2)/def2-TZVPD level     | S13 |
| S11 | Excitation energies ( $E_g$ ) and oscillator strengths( $f_{osc}$ ) of three different conformers for <b><i>trans</i>-(BPY)<sub>4</sub></b> calculated at RI-ADC(2) level and using two different functionals B3LYP and CAM-B3LYP using the def2-TZVPD basis set                                                      | S14 |
| S12 | Excitation energies ( $E_g$ ) and oscillator strengths( $f_{osc}$ ) for three different conformers of <b><i>cis</i>-(BPY)<sub>4</sub></b> calculated at RI-ADC(2) level and using two different functionals B3LYP and CAM-B3LYP using the def2-TZVPD basis set . . . .                                                | S15 |
| S13 | Excitation energies ( $E_g$ ), oscillator strengths( $f_{osc}$ ), and $\omega_{CT}$ values of first five states of three different conformers of <b><i>trans</i>-(BPY)<sub>4</sub></b> calculated at RI-ADC(2) level and using two different functionals B3LYP and CAM-B3LYP using the def2-TZVPD basis set . . . . . | S21 |
| S14 | Excitation energies ( $E_g$ ), oscillator strengths( $f_{osc}$ ), and $\omega_{CT}$ values of first five states of three different conformers of <b><i>cis</i>-(BPY)<sub>4</sub></b> calculated at RI-ADC(2) level and using two different functionals B3LYP and CAM-B3LYP using the def2-TZVPD basis set . . . . .   | S22 |

## List of Figures

|     |                                                                                                                                                                                                                                                            |     |
|-----|------------------------------------------------------------------------------------------------------------------------------------------------------------------------------------------------------------------------------------------------------------|-----|
| S1  | Ground state optimized structures of <i>trans</i> - and <i>cis</i> -(BPY) <sub>2</sub> for <i>o</i> -, <i>m</i> -, and <i>p</i> - conformers obtained at B3LYP-D3/def2-SVPD level. . . . .                                                                 | S6  |
| S2  | Optimized geometries of <i>trans</i> - and <i>cis</i> -(BPY) <sub>3</sub> for <i>o</i> -, <i>m</i> -, and <i>p</i> - conformers. In this figure, (a) and (b) are the cyclic (cy) analogs of <i>o</i> - and <i>p</i> - conformers, respectively. . . . .    | S6  |
| S3  | Absorption spectra of <i>o</i> -, <i>m</i> -, and <i>p</i> - conformers for <i>trans</i> - and <i>cis</i> -(BPY) <sub>4</sub> obtained at RI-ADC(2) level and using two different functionals B3LYP and CAM-B3LYP using the def2-TZVPD basis set . . . . . | S16 |
| S4  | Absorption spectra of cy- <i>o</i> - and cy- <i>p</i> - obtained at RI-ADC(2) level and using two different functionals B3LYP and CAM-B3LYP using the def2-TZVPD basis set . . . . .                                                                       | S17 |
| S5  | Natural transition orbitals corresponding to the S <sub>1</sub> states of three different conformers of <i>cis</i> -(BPY) <sub>2</sub> . Here, $\lambda$ value represents the weight of a configuration. . . . .                                           | S18 |
| S6  | <i>e-h</i> correlation plots corresponding to the first five excited states of <i>cis</i> -(BPY) <sub>2</sub> for three different conformers. . . . .                                                                                                      | S19 |
| S7  | Natural transition orbitals corresponding to the S <sub>1</sub> states of three different conformers of <i>cis</i> -(BPY) <sub>4</sub> . Here, $\lambda$ value represents the weight of a configuration. . . . .                                           | S19 |
| S8  | <i>e-h</i> correlation plots corresponding to the first five excited states of <i>cis</i> -(BPY) <sub>4</sub> for three different conformers. . . . .                                                                                                      | S20 |
| S9  | <i>e-h</i> correlation plots obtained using the RI-ADC(2) method, and B3LYP and CAM-B3LYP functionals for the first five excited states of <i>o-trans</i> -(BPY) <sub>4</sub>                                                                              | S23 |
| S10 | <i>e-h</i> correlation plots obtained using the RI-ADC(2) method, and B3LYP and CAM-B3LYP functionals for the first five excited states of <i>m-trans</i> -(BPY) <sub>4</sub>                                                                              | S23 |

- S11 *e-h* correlation plots obtained using the RI-ADC(2) method, and B3LYP and CAM-B3LYP functionals for the first five excited states of ***p-trans***-(BPY)<sub>4</sub> . . . S24
- S12 *e-h* correlation plots obtained using the RI-ADC(2) method, and B3LYP and CAM-B3LYP functionals for the first five excited states of ***o-cis***-(BPY)<sub>4</sub> . . . S24
- S13 *e-h* correlation plots obtained using the RI-ADC(2) method, and B3LYP and CAM-B3LYP functionals for the first five excited states of ***m-cis***-(BPY)<sub>4</sub> . . . S24
- S14 *e-h* correlation plots obtained using the RI-ADC(2) method, and B3LYP and CAM-B3LYP functionals for the first five excited states of ***p-cis***-(BPY)<sub>4</sub> . . . S25

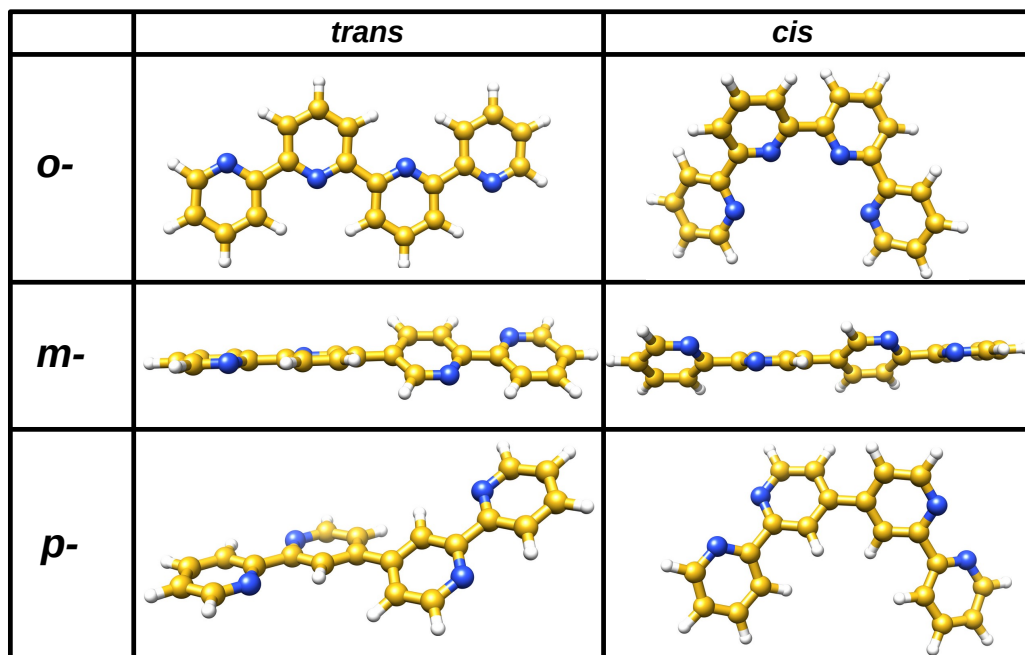

Figure S1: Ground state optimized structures of *trans*- and *cis*-(BPY)<sub>2</sub> for *o*-, *m*-, and *p*- conformers obtained at B3LYP-D3/def2-SVPD level.

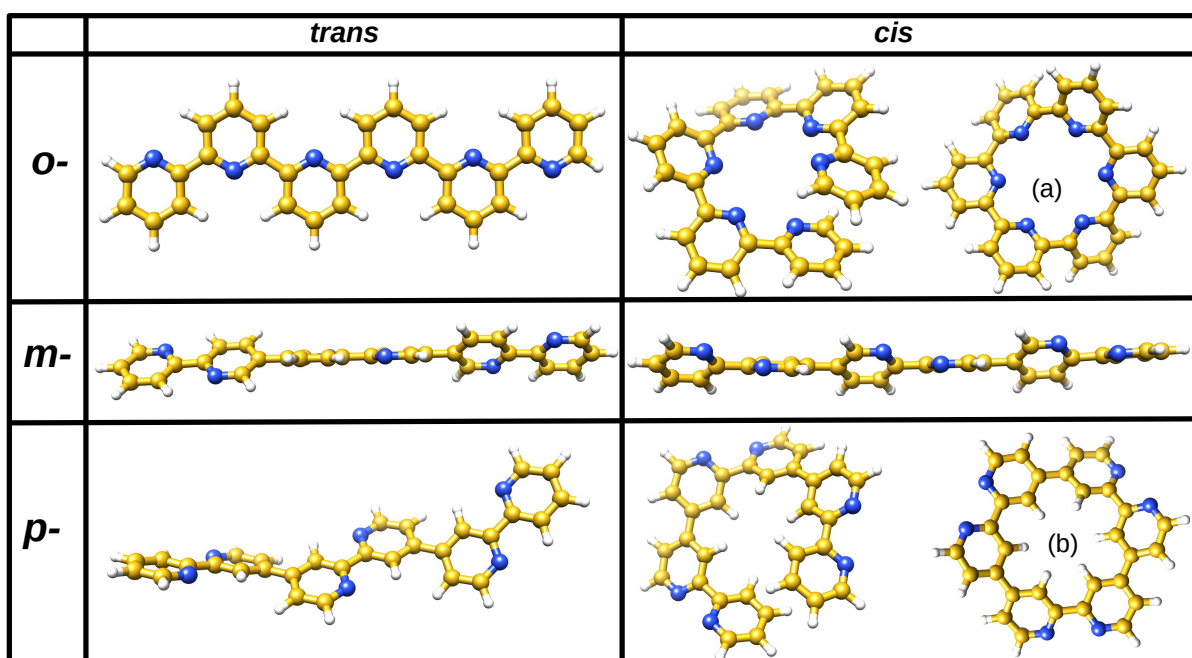

Figure S2: Optimized geometries of *trans*- and *cis*-(BPY)<sub>3</sub> for *o*-, *m*-, and *p*- conformers. In this figure, (a) and (b) are the cyclic (cy) analogs of *o*- and *p*- conformers, respectively.

**Table S1: Energies (in eV) of ground state optimized structures of all the oligomers at B3LYP-D3/def2-SVPD level**

| <i>trans</i>  | (BPY) <sub>2</sub> | (BPY) <sub>3</sub> | (BPY) <sub>4</sub> |
|---------------|--------------------|--------------------|--------------------|
| <i>o-</i>     | 0.00               | 0.00               | 0.00               |
| <i>m-</i>     | 0.19               | 0.38               | 0.57               |
| <i>p-</i>     | 0.17               | 0.33               | 0.50               |
| <hr/>         |                    |                    |                    |
| <i>cis</i>    |                    |                    |                    |
| <i>o-</i>     | 0.91               | 1.38               | 0.50               |
| cy- <i>o-</i> |                    | 33.91              |                    |
| <i>m-</i>     | 0.88               | 1.28               | 1.77               |
| <i>p-</i>     | 0.86               | 1.12               | 1.04               |
| cy- <i>p-</i> |                    | 33.67              |                    |

In the case of *trans* oligomers for *o-* conformer, only one type of the dihedral angle  $\phi_i$ , defined as  $\angle\text{N-C-C-C}$ , is used. In *m-* and *p-*, two types of dihedral angles,  $\phi_j$  and  $\phi_k$ , are used which are defined as  $\angle\text{N-C-C-C}$  and  $\angle\text{C-C-C-C}$ , respectively. Similarly, in the case of *cis-o-* conformer, only one type of dihedral angle  $\phi_i = \angle\text{N-C-C-N}$  is used, whereas for *m-* and *p-* two types of dihedral angles  $\phi_j = \angle\text{N-C-C-N}$  and  $\phi_k = \angle\text{C-C-C-C}$  are used. In the case of tetramers, for example,  $i=1-7$ ,  $j=1, 3, 5, 7$ , and  $k=2, 4, 6$ .

**Table S2: Calculated dihedral angles ( $\phi_{1-7}$ ) of (BPY)<sub>2</sub>-(BPY)<sub>4</sub> for *trans-* structures of *o-* conformer at B3LYP-D3/def2-SVPD level**

| Angle    | (BPY) <sub>2</sub> | (BPY) <sub>3</sub> | (BPY) <sub>4</sub> |
|----------|--------------------|--------------------|--------------------|
| $\phi_1$ | 0                  | 0                  | 0                  |
| $\phi_2$ | 0                  | 0                  | 0                  |
| $\phi_3$ | 0                  | 0                  | 0                  |
| $\phi_4$ |                    | 0                  | 0                  |
| $\phi_5$ |                    | 0                  | 0                  |
| $\phi_6$ |                    |                    | 0                  |
| $\phi_7$ |                    |                    | 0                  |

**Table S3:** Calculated dihedral angles ( $\phi_{1-7}$ ) of (BPY)<sub>2</sub>-(BPY)<sub>4</sub> for *trans*- structures of *m*- and *p*- conformers at B3LYP-D3/def2-SVPD level

| Angle    | <i>m</i> -         |                    |                    | <i>p</i> -         |                    |                    |
|----------|--------------------|--------------------|--------------------|--------------------|--------------------|--------------------|
|          | (BPY) <sub>2</sub> | (BPY) <sub>3</sub> | (BPY) <sub>4</sub> | (BPY) <sub>2</sub> | (BPY) <sub>3</sub> | (BPY) <sub>4</sub> |
| $\phi_1$ | 0                  | 0                  | 0                  | -0.8               | -0.8               | 0.6                |
| $\phi_2$ | 37.2               | -37                | 37.1               | 33.7               | 33.6               | -33.3              |
| $\phi_3$ | 0                  | 0                  | 0                  | -0.5               | -1.6               | 1.6                |
| $\phi_4$ |                    | 37                 | 37.2               |                    | 33.6               | -33.5              |
| $\phi_5$ |                    | 0                  | 0                  |                    | 0.5                | 1.6                |
| $\phi_6$ |                    |                    | 37.1               |                    |                    | -33.3              |
| $\phi_7$ |                    |                    | 0                  |                    |                    | 0.8                |

**Table S4:** Calculated dihedral angles ( $\phi_{1-7}$ ) of (BPY)<sub>2</sub>-(BPY)<sub>4</sub> for *cis*- structures of *o*- conformer at B3LYP-D3/def2-SVPD level

| Angle    | <i>o</i> -         |                    |                       |                    |
|----------|--------------------|--------------------|-----------------------|--------------------|
|          | (BPY) <sub>2</sub> | (BPY) <sub>3</sub> | cy-(BPY) <sub>3</sub> | (BPY) <sub>4</sub> |
| $\phi_1$ | 39.6               | -30.3              | -26.5                 | 38.7               |
| $\phi_2$ | -38.4              | 20.8               | -26.5                 | -26.0              |
| $\phi_3$ | 39.6               | -44.6              | 51.7                  | 53.3               |
| $\phi_4$ |                    | 20.8               | -26.5                 | -38.6              |
| $\phi_5$ |                    | -30.3              | -26.5                 | 53.3               |
| $\phi_6$ |                    |                    | 51.7                  | -26.0              |
| $\phi_7$ |                    |                    |                       | 38.7               |

**Table S5:** Calculated dihedral angles ( $\phi_{1-7}$ ) of (BPY)<sub>2</sub>-(BPY)<sub>4</sub> for *cis*- structures of *m*- and *p*- conformers at B3LYP-D3/def2-SVPD level

| Angle    | <i>m</i> -         |                    |                    | <i>p</i> -         |                    |                       |                    |
|----------|--------------------|--------------------|--------------------|--------------------|--------------------|-----------------------|--------------------|
|          | (BPY) <sub>2</sub> | (BPY) <sub>3</sub> | (BPY) <sub>4</sub> | (BPY) <sub>2</sub> | (BPY) <sub>3</sub> | cy-(BPY) <sub>3</sub> | (BPY) <sub>4</sub> |
| $\phi_1$ | 35.2               | 35.3               | 35.2               | -37.3              | -40.0              | -17.5                 | -42.5              |
| $\phi_2$ | -37.9              | -37.7              | -37.8              | 35.7               | 26.8               | -23.9                 | 29.0               |
| $\phi_3$ | 35.2               | 33.2               | 33.0               | -37.3              | -42.2              | 41.6                  | -42                |
| $\phi_4$ |                    | -37.8              | -37.8              |                    | 26.8               | -23.9                 | 22.3               |
| $\phi_5$ |                    | 35.3               | 33.1               |                    | -40.0              | -17.5                 | -42.0              |
| $\phi_6$ |                    |                    | -37.8              |                    |                    | 39.0                  | 29.0               |
| $\phi_7$ |                    |                    | 35.2               |                    |                    |                       | -42.5              |



**Table S6:** Vertical excitation energies ( $E_g$ ), oscillator strengths ( $f_{osc}$ ) and the rotatory strengths ( $R$  in  $10^{-40}$  erg-esu-cm/Gauss) of first sixteen excited states for three conformers of *trans*- and *cis*-(BPY)<sub>2</sub> obtained at RI-ADC(2)/def2-TZVPD level

| <i>trans</i>    |       | <i>o-</i> |           |        | <i>m-</i> |       |           | <i>p-</i> |       |       |           |         |
|-----------------|-------|-----------|-----------|--------|-----------|-------|-----------|-----------|-------|-------|-----------|---------|
| State           | irrep | $E_g$     | $f_{osc}$ | $R$    | irrep     | $E_g$ | $f_{osc}$ | $R$       | irrep | $E_g$ | $f_{osc}$ | $R$     |
| S <sub>1</sub>  | A     | 4.37      | 0.000     | 0.00   | B         | 4.19  | 1.487     | -1.68     | A     | 4.33  | 0.005     | -6.41   |
| S <sub>2</sub>  | B     | 4.37      | 0.000     | 0.00   | A         | 4.20  | 0.002     | -1.80     | B     | 4.34  | 0.013     | 29.95   |
| S <sub>3</sub>  | A     | 4.39      | 0.000     | 0.00   | B         | 4.38  | 0.292     | 28.89     | A     | 4.51  | 0.014     | -11.13  |
| S <sub>4</sub>  | B     | 4.46      | 0.460     | 0.00   | A         | 4.62  | 0.000     | 1.84      | B     | 4.55  | 0.298     | 102.66  |
| S <sub>5</sub>  | A     | 4.48      | 0.004     | 0.00   | A         | 4.64  | 0.001     | 2.40      | A     | 4.64  | 0.000     | 2.56    |
| S <sub>6</sub>  | B     | 4.70      | 0.000     | 0.00   | B         | 4.73  | 0.036     | -56.86    | B     | 4.66  | 0.060     | -160.54 |
| S <sub>7</sub>  | B     | 4.78      | 0.696     | 0.00   | B         | 4.75  | 0.010     | -62.68    | B     | 4.80  | 0.637     | -235.95 |
| S <sub>8</sub>  | B     | 4.79      | 0.000     | 0.00   | A         | 4.82  | 0.001     | -8.71     | A     | 4.84  | 0.034     | 237.77  |
| S <sub>9</sub>  | A     | 4.80      | 0.000     | 0.00   | B         | 4.92  | 0.001     | 13.02     | B     | 4.91  | 0.001     | 0.86    |
| S <sub>10</sub> | A     | 4.82      | 0.000     | 0.00   | A         | 4.94  | 0.000     | -2.53     | A     | 4.91  | 0.000     | -0.11   |
| S <sub>11</sub> | A     | 5.05      | 0.004     | 0.00   | B         | 5.10  | 0.006     | 12.17     | A     | 5.08  | 0.005     | 3.28    |
| S <sub>12</sub> | B     | 5.06      | 0.000     | 0.00   | A         | 5.12  | 0.006     | -10.70    | B     | 5.08  | 0.000     | -1.66   |
| S <sub>13</sub> | B     | 5.13      | 0.228     | 0.00   | B         | 5.14  | 0.041     | -21.79    | B     | 5.30  | 0.113     | -13.22  |
| S <sub>14</sub> | A     | 5.35      | 0.000     | 0.00   | A         | 5.39  | 0.000     | 2.66      | A     | 5.41  | 0.027     | 90.78   |
| S <sub>15</sub> | B     | 5.47      | 0.580     | 0.00   | A         | 5.46  | 0.008     | 60.34     | B     | 5.47  | 1.217     | -127.51 |
| S <sub>16</sub> | A     | 5.74      | 0.000     | 0.00   | B         | 5.91  | 0.070     | -29.31    | A     | 5.75  | 0.000     | -1.82   |
| <i>cis</i>      |       |           |           |        |           |       |           |           |       |       |           |         |
| S <sub>1</sub>  | A     | 4.38      | 0.000     | 0.55   | B         | 4.28  | 0.301     | -99.18    | B     | 4.35  | 0.003     | -7.50   |
| S <sub>2</sub>  | B     | 4.44      | 0.001     | -2.91  | A         | 4.31  | 0.000     | -4.22     | A     | 4.36  | 0.005     | 37.99   |
| S <sub>3</sub>  | A     | 4.47      | 0.000     | 0.67   | B         | 4.48  | 0.781     | -213.58   | A     | 4.56  | 0.008     | 45.18   |
| S <sub>4</sub>  | B     | 4.52      | 0.003     | 25.56  | A         | 4.55  | 0.000     | 0.42      | B     | 4.57  | 0.007     | 13.80   |
| S <sub>5</sub>  | A     | 4.58      | 0.001     | -14.94 | B         | 4.59  | 0.383     | 310.76    | B     | 4.68  | 0.065     | 22.93   |
| S <sub>6</sub>  | B     | 4.59      | 0.010     | -46.51 | A         | 4.78  | 0.000     | -2.55     | A     | 4.75  | 0.134     | -100.47 |
| S <sub>7</sub>  | B     | 4.72      | 0.279     | -68.46 | B         | 4.79  | 0.076     | 108.99    | B     | 4.77  | 0.001     | -4.37   |
| S <sub>8</sub>  | A     | 4.86      | 0.002     | 17.60  | A         | 4.86  | 0.000     | -4.24     | A     | 4.77  | 0.012     | -4.69   |
| S <sub>9</sub>  | B     | 4.86      | 0.003     | -6.70  | A         | 4.90  | 0.000     | 0.01      | B     | 4.91  | 0.003     | 0.00    |
| S <sub>10</sub> | A     | 4.89      | 0.121     | 89.00  | B         | 4.90  | 0.005     | 17.34     | A     | 4.91  | 0.001     | 8.11    |
| S <sub>11</sub> | B     | 5.07      | 0.015     | -92.64 | B         | 4.94  | 0.217     | -84.32    | B     | 5.06  | 0.202     | 132.95  |
| S <sub>12</sub> | A     | 5.10      | 0.118     | 23.02  | A         | 5.06  | 0.015     | -14.32    | A     | 5.08  | 0.062     | -46.53  |
| S <sub>13</sub> | B     | 5.31      | 0.095     | 9.21   | B         | 5.10  | 0.022     | 23.01     | B     | 5.42  | 0.101     | 35.92   |
| S <sub>14</sub> | A     | 5.58      | 0.476     | 215.72 | A         | 5.52  | 0.002     | 11.30     | B     | 5.52  | 0.944     | -24.65  |
| S <sub>15</sub> | B     | 5.68      | 0.078     | -19.81 | A         | 5.68  | 0.003     | 5.81      | A     | 5.59  | 0.457     | -124.32 |
| S <sub>16</sub> | A     | 5.70      | 0.028     | 5.03   | B         | 5.96  | 0.008     | 9.70      | A     | 5.66  | 0.064     | -29.72  |

**Table S7:** Vertical excitation energies ( $E_g$ ), oscillator strengths ( $f_{osc}$ ) and the rotatory strengths ( $R$  in  $10^{-40}$  erg-esu-cm/Gauss) of first sixteen excited states for three conformers of *trans*- and *cis*-(BPY)<sub>3</sub> obtained at RI-ADC(2)/def2-TZVPD level

| <i>trans</i>    |   |       |           |         | <i>o-</i> |       |           |         |       | <i>m-</i> |           |         |       |       | <i>p-</i> |         |  |  |  |
|-----------------|---|-------|-----------|---------|-----------|-------|-----------|---------|-------|-----------|-----------|---------|-------|-------|-----------|---------|--|--|--|
| State           |   | $E_g$ | $f_{osc}$ | $R$     | irrep     | $E_g$ | $f_{osc}$ | $R$     | irrep | $E_g$     | $f_{osc}$ | $R$     | irrep | $E_g$ | $f_{osc}$ | $R$     |  |  |  |
| S <sub>1</sub>  | A | 4.34  | 0.000     | 0.00    | B         | 3.94  | 2.785     | 23.69   | A     | 4.30      | 0.007     | 0.03    | A     | 4.33  | 0.001     | -10.91  |  |  |  |
| S <sub>2</sub>  | B | 4.35  | 0.000     | 0.00    | A         | 4.12  | 0.001     | 2.61    | A     | 4.33      | 0.001     | -10.91  | B     | 4.33  | 0.019     | 34.58   |  |  |  |
| S <sub>3</sub>  | A | 4.36  | 0.000     | 0.00    | B         | 4.25  | 0.065     | -12.97  | B     | 4.33      | 0.019     | 34.58   | A     | 4.37  | 0.001     | 0.00    |  |  |  |
| S <sub>4</sub>  | B | 4.37  | 0.001     | 0.00    | A         | 4.30  | 0.001     | 3.20    | B     | 4.47      | 0.137     | 87.82   | A     | 4.37  | 0.000     | 0.00    |  |  |  |
| S <sub>5</sub>  | A | 4.37  | 0.000     | 0.00    | A         | 4.49  | 0.002     | -9.67   | A     | 4.48      | 0.015     | -43.96  | B     | 4.42  | 0.000     | 0.00    |  |  |  |
| S <sub>6</sub>  | B | 4.42  | 0.000     | 0.00    | B         | 4.55  | 0.009     | -1.30   | B     | 4.53      | 0.317     | 71.28   | A     | 4.43  | 0.000     | 0.00    |  |  |  |
| S <sub>7</sub>  | A | 4.43  | 0.000     | 0.00    | A         | 4.56  | 0.000     | 4.76    | A     | 4.55      | 0.044     | 133.02  | B     | 4.46  | 1.230     | -0.01   |  |  |  |
| S <sub>8</sub>  | B | 4.46  | 1.230     | -0.01   | B         | 4.63  | 0.039     | -11.91  | B     | 4.56      | 0.381     | -217.32 | A     | 4.50  | 0.007     | 0.00    |  |  |  |
| S <sub>9</sub>  | A | 4.50  | 0.007     | 0.00    | A         | 4.69  | 0.001     | -1.23   | A     | 4.64      | 0.001     | -4.82   | B     | 4.65  | 0.000     | 0.00    |  |  |  |
| S <sub>10</sub> | B | 4.65  | 0.000     | 0.00    | A         | 4.71  | 0.000     | 4.50    | B     | 4.64      | 0.120     | -244.57 | A     | 4.75  | 0.000     | 0.00    |  |  |  |
| S <sub>11</sub> | A | 4.75  | 0.000     | 0.00    | B         | 4.73  | 0.056     | 199.77  | B     | 4.81      | 0.534     | -494.18 | B     | 4.75  | 0.000     | 0.00    |  |  |  |
| S <sub>12</sub> | B | 4.75  | 0.000     | 0.00    | B         | 4.78  | 0.100     | -22.73  | A     | 4.83      | 0.123     | 565.32  | B     | 4.78  | 0.744     | -0.02   |  |  |  |
| S <sub>13</sub> | B | 4.78  | 0.744     | -0.02   | B         | 4.89  | 0.007     | -35.00  | A     | 4.90      | 0.000     | -0.65   | A     | 4.79  | 0.000     | 0.00    |  |  |  |
| S <sub>14</sub> | A | 4.79  | 0.000     | 0.00    | A         | 4.92  | 0.000     | 3.59    | A     | 4.91      | 0.000     | 0.51    | B     | 4.83  | 0.000     | 0.00    |  |  |  |
| S <sub>15</sub> | B | 4.83  | 0.000     | 0.00    | B         | 4.93  | 0.001     | 3.66    | B     | 4.91      | 0.000     | 0.97    | A     | 4.84  | 0.000     | 0.00    |  |  |  |
| S <sub>16</sub> | A | 4.84  | 0.000     | 0.00    | A         | 5.05  | 0.002     | 4.08    | B     | 5.07      | 0.001     | -1.19   |       |       |           |         |  |  |  |
| <i>cis</i>      |   |       |           |         |           |       |           |         |       |           |           |         |       |       |           |         |  |  |  |
| S <sub>1</sub>  | B | 3.98  | 0.000     | -1.77   | B         | 4.17  | 1.960     | -274.92 | B     | 4.31      | 0.007     | 24.89   | A     | 3.98  | 0.000     | -0.76   |  |  |  |
| S <sub>2</sub>  | A | 3.98  | 0.000     | -0.76   | A         | 4.18  | 0.001     | -5.16   | A     | 4.31      | 0.000     | 5.00    | B     | 4.15  | 0.000     | -0.41   |  |  |  |
| S <sub>3</sub>  | B | 4.15  | 0.000     | -0.41   | A         | 4.30  | 0.000     | 1.27    | A     | 4.34      | 0.001     | 8.13    | A     | 4.16  | 0.000     | 2.10    |  |  |  |
| S <sub>4</sub>  | A | 4.16  | 0.000     | 2.10    | B         | 4.33  | 0.235     | -5.04   | B     | 4.37      | 0.008     | 35.70   | A     | 4.31  | 0.000     | -0.10   |  |  |  |
| S <sub>5</sub>  | A | 4.31  | 0.000     | -0.10   | B         | 4.43  | 0.365     | 184.29  | B     | 4.55      | 0.001     | -21.27  | B     | 4.34  | 0.002     | -2.24   |  |  |  |
| S <sub>6</sub>  | B | 4.34  | 0.002     | -2.24   | A         | 4.54  | 0.002     | 5.25    | A     | 4.56      | 0.012     | 65.44   | B     | 4.38  | 0.000     | 4.91    |  |  |  |
| S <sub>7</sub>  | B | 4.38  | 0.000     | 4.91    | B         | 4.55  | 0.044     | 121.95  | B     | 4.58      | 0.019     | 82.03   | A     | 4.38  | 0.000     | -1.56   |  |  |  |
| S <sub>8</sub>  | A | 4.38  | 0.000     | -1.56   | A         | 4.67  | 0.011     | -4.77   | A     | 4.63      | 0.025     | -42.42  | B     | 4.44  | 0.001     | 15.75   |  |  |  |
| S <sub>9</sub>  | A | 4.44  | 0.001     | 15.75   | B         | 4.76  | 0.115     | 27.44   | B     | 4.71      | 0.211     | -139.30 | A     | 4.44  | 0.002     | 31.47   |  |  |  |
| S <sub>10</sub> | B | 4.44  | 0.002     | 31.47   | A         | 4.77  | 0.000     | -1.28   | A     | 4.73      | 0.034     | 5.35    | B     | 4.51  | 0.049     | -514.84 |  |  |  |
| S <sub>11</sub> | B | 4.51  | 0.049     | -514.84 | B         | 4.78  | 0.074     | 136.53  | B     | 4.76      | 0.000     | 0.03    | A     | 4.60  | 0.328     | 345.84  |  |  |  |
| S <sub>12</sub> | A | 4.60  | 0.328     | 345.84  | A         | 4.81  | 0.006     | -22.97  | A     | 4.76      | 0.000     | -1.80   | B     | 4.67  | 0.004     | -0.06   |  |  |  |
| S <sub>13</sub> | B | 4.67  | 0.004     | -0.06   | B         | 4.84  | 0.015     | -24.76  | A     | 4.77      | 0.049     | 8.71    | A     | 4.68  | 0.004     | 15.53   |  |  |  |
| S <sub>14</sub> | A | 4.68  | 0.004     | 15.53   | B         | 4.89  | 0.066     | -61.39  | B     | 4.79      | 0.004     | 4.83    | B     | 4.85  | 0.176     | -93.22  |  |  |  |
| S <sub>15</sub> | B | 4.85  | 0.176     | -93.22  | A         | 4.90  | 0.000     | 0.04    | B     | 4.89      | 0.002     | -3.79   | A     | 4.88  | 0.001     | 2.05    |  |  |  |
| S <sub>16</sub> | A | 4.88  | 0.001     | 2.05    | A         | 4.91  | 0.000     | 0.01    | A     | 4.89      | 0.000     | 9.38    |       |       |           |         |  |  |  |

**Table S8:** Vertical excitation energies ( $E_g$ ), oscillator strengths ( $f_{\text{osc}}$ ) and the rotatory strengths ( $R$  in  $10^{-40}$  erg-esu-cm/Gauss) of first sixteen excited states for cy-*o*- and cy-*p*- conformers of *cis*-(BPY)<sub>3</sub> obtained at RI-ADC(2)/def2-TZVPD level

| State           | irrep | cy- <i>o</i> - |                  |         | cy- <i>p</i> - |       |                  | $R$     |
|-----------------|-------|----------------|------------------|---------|----------------|-------|------------------|---------|
|                 |       | $E_g$          | $f_{\text{osc}}$ | $R$     | irrep          | $E_g$ | $f_{\text{osc}}$ |         |
| S <sub>1</sub>  | A     | 4.05           | 0.000            | 0.00    | B              | 4.08  | 0.000            | 0.10    |
| S <sub>2</sub>  | B     | 4.05           | 0.001            | 4.06    | A              | 4.08  | 0.001            | -0.37   |
| S <sub>3</sub>  | B     | 4.18           | 0.000            | 1.96    | A              | 4.30  | 0.020            | 3.20    |
| S <sub>4</sub>  | A     | 4.18           | 0.000            | 0.56    | B              | 4.33  | 0.026            | -113.55 |
| S <sub>5</sub>  | A     | 4.39           | 0.001            | 23.68   | B              | 4.33  | 0.010            | -46.02  |
| S <sub>6</sub>  | B     | 4.40           | 0.000            | 7.25    | A              | 4.34  | 0.012            | 90.82   |
| S <sub>7</sub>  | B     | 4.40           | 0.000            | 7.42    | B              | 4.39  | 0.017            | 121.59  |
| S <sub>8</sub>  | A     | 4.40           | 0.000            | 0.00    | A              | 4.44  | 0.161            | -63.88  |
| S <sub>9</sub>  | B     | 4.49           | 0.001            | -16.16  | B              | 4.49  | 0.003            | -1.49   |
| S <sub>10</sub> | A     | 4.51           | 0.000            | 4.62    | A              | 4.49  | 0.000            | -4.52   |
| S <sub>11</sub> | A     | 4.52           | 0.012            | 200.15  | B              | 4.60  | 0.154            | 24.71   |
| S <sub>12</sub> | A     | 4.54           | 0.000            | 0.00    | A              | 4.67  | 0.061            | -44.97  |
| S <sub>13</sub> | B     | 4.55           | 0.014            | 31.24   | B              | 4.69  | 0.013            | 12.29   |
| S <sub>14</sub> | B     | 4.62           | 0.348            | -452.78 | A              | 4.69  | 0.004            | 6.79    |
| S <sub>15</sub> | A     | 4.82           | 0.000            | 0.00    | A              | 4.72  | 0.006            | -1.60   |
| S <sub>16</sub> | B     | 4.83           | 0.354            | 317.22  | B              | 4.76  | 0.023            | 3.83    |

**Table S9:**  $E_g$ ,  $f_{osc}$ , Rotatory Strengths ( $R$  in erg-esu-cm/Gauss),  $|\mu|$  (in esu-cm),  $|m|$  (in erg-G<sup>-1</sup>),  $\cos \theta$ ,  $g_{CD}$ , and  $|m|/|\mu|$  values of the first sixteen excited states of *trans*-(BPY)<sub>4</sub> for three conformers obtained at RI-ADC(2)/def2-TZVPD level

| <i>o-</i>       |       |       |           |              |                  |                |               |          |             |
|-----------------|-------|-------|-----------|--------------|------------------|----------------|---------------|----------|-------------|
| State           | irrep | $E_g$ | $f_{osc}$ | $R/10^{-40}$ | $ \mu /10^{-20}$ | $ m /10^{-20}$ | $\cos \theta$ | $g_{CD}$ | $ m / \mu $ |
| S <sub>1</sub>  | A     | 4.33  | 0.000     | 0.00         | 3.537            | 0.000          | 0.000         | 0.000    | 0.000       |
| S <sub>2</sub>  | A     | 4.35  | 0.000     | 0.00         | 0.000            | 0.752          | 0.000         | 0.000    | Inf         |
| S <sub>3</sub>  | B     | 4.35  | 0.001     | 0.00         | 28.699           | 0.000          | 0.000         | 0.000    | 0.000       |
| S <sub>4</sub>  | A     | 4.36  | 0.000     | 0.00         | 2.665            | 0.000          | 0.992         | 0.000    | 0.000       |
| S <sub>5</sub>  | A     | 4.38  | 0.000     | 0.00         | 0.000            | 2.578          | 0.000         | 0.000    | Inf         |
| S <sub>6</sub>  | A     | 4.39  | 0.000     | 0.00         | 14.058           | 0.000          | 0.000         | 0.000    | 0.000       |
| S <sub>7</sub>  | B     | 4.41  | 0.013     | 0.00         | 87.001           | 0.000          | 0.000         | 0.000    | 0.000       |
| S <sub>8</sub>  | B     | 4.46  | 2.060     | 0.00         | 1104.190         | 0.000          | 0.000         | 0.000    | 0.000       |
| S <sub>9</sub>  | A     | 4.46  | 0.000     | 0.00         | 0.000            | 0.881          | 0.000         | 0.000    | Inf         |
| S <sub>10</sub> | A     | 4.51  | 0.009     | -0.01        | 73.286           | 0.000          | -0.763        | 0.000    | 0.000       |
| S <sub>11</sub> | A     | 4.70  | 0.000     | 0.00         | 10.560           | 0.000          | 0.000         | 0.000    | 0.000       |
| S <sub>12</sub> | B     | 4.79  | 0.747     | 0.00         | 641.601          | 0.000          | 0.000         | 0.000    | 0.000       |
| S <sub>13</sub> | B     | 4.97  | 0.465     | 0.00         | 497.053          | 0.000          | 0.000         | 0.000    | 0.000       |
| S <sub>14</sub> | B     | 5.12  | 0.067     | 0.00         | 186.130          | 0.000          | 0.000         | 0.000    | 0.000       |
| S <sub>15</sub> | B     | 5.27  | 0.216     | 0.00         | 328.783          | 0.000          | 0.000         | 0.000    | 0.000       |
| S <sub>16</sub> | B     | 5.46  | 1.809     | 0.00         | 934.459          | 0.000          | 0.000         | 0.000    | 0.000       |
| <i>m-</i>       |       |       |           |              |                  |                |               |          |             |
| S <sub>1</sub>  | B     | 3.82  | 3.796     | -9.29        | 1619.100         | 0.038          | -0.151        | 0.000    | 0.000       |
| S <sub>2</sub>  | A     | 4.09  | 0.002     | -1.47        | 34.167           | 0.043          | -1.000        | -0.005   | 0.001       |
| S <sub>3</sub>  | B     | 4.17  | 0.032     | -4.72        | 141.604          | 0.346          | -0.096        | -0.001   | 0.002       |
| S <sub>4</sub>  | A     | 4.19  | 0.000     | 2.67         | 13.522           | 0.198          | 1.000         | 0.059    | 0.015       |
| S <sub>5</sub>  | A     | 4.28  | 0.001     | -4.97        | 18.814           | 0.264          | -1.000        | -0.056   | 0.014       |
| S <sub>6</sub>  | B     | 4.33  | 0.110     | 13.53        | 258.454          | 0.295          | 0.178         | 0.001    | 0.001       |
| S <sub>7</sub>  | A     | 4.50  | 0.000     | -2.76        | 11.727           | 0.236          | -1.000        | -0.080   | 0.020       |
| S <sub>8</sub>  | B     | 4.52  | 0.288     | 98.00        | 409.653          | 0.513          | 0.466         | 0.002    | 0.001       |
| S <sub>9</sub>  | A     | 4.54  | 0.000     | 3.47         | 6.923            | 0.502          | 1.000         | 0.288    | 0.072       |
| S <sub>10</sub> | B     | 4.57  | 0.000     | -0.14        | 1.240            | 0.372          | -0.303        | -0.334   | 0.300       |
| S <sub>11</sub> | A     | 4.64  | 0.000     | 4.94         | 14.121           | 0.350          | 1.000         | 0.099    | 0.025       |
| S <sub>12</sub> | B     | 4.64  | 0.007     | 11.30        | 60.993           | 0.237          | 0.781         | 0.012    | 0.004       |
| S <sub>13</sub> | A     | 4.71  | 0.001     | -0.65        | 18.426           | 0.035          | -1.000        | -0.008   | 0.002       |
| S <sub>14</sub> | B     | 4.72  | 0.004     | 30.48        | 46.522           | 0.659          | 0.995         | 0.056    | 0.014       |
| S <sub>15</sub> | B     | 4.74  | 0.120     | -252.97      | 258.214          | 1.039          | -0.943        | -0.015   | 0.004       |
| S <sub>16</sub> | A     | 4.76  | 0.001     | -4.68        | 16.917           | 0.277          | -1.000        | -0.065   | 0.016       |
| <i>p-</i>       |       |       |           |              |                  |                |               |          |             |
| S <sub>1</sub>  | A     | 4.33  | 0.010     | 8.75         | 76.791           | 0.114          | 1.000         | 0.006    | 0.001       |
| S <sub>2</sub>  | B     | 4.33  | 0.002     | -8.61        | 34.083           | 0.340          | -0.744        | -0.030   | 0.010       |
| S <sub>3</sub>  | A     | 4.37  | 0.000     | 6.06         | 7.753            | 0.782          | 1.000         | 0.399    | 0.101       |
| S <sub>4</sub>  | B     | 4.37  | 0.015     | -26.28       | 95.222           | 0.367          | -0.752        | -0.012   | 0.004       |
| S <sub>5</sub>  | A     | 4.52  | 0.000     | -6.77        | 8.720            | 0.777          | -1.000        | -0.354   | 0.089       |
| S <sub>6</sub>  | B     | 4.52  | 0.152     | -138.91      | 297.647          | 0.808          | -0.578        | -0.006   | 0.003       |
| S <sub>7</sub>  | A     | 4.54  | 0.032     | 49.94        | 136.574          | 0.366          | 1.000         | 0.011    | 0.003       |
| S <sub>8</sub>  | B     | 4.56  | 0.282     | -36.31       | 403.326          | 0.735          | -0.122        | -0.001   | 0.002       |
| S <sub>9</sub>  | A     | 4.61  | 0.008     | 6.04         | 68.041           | 0.089          | 1.000         | 0.005    | 0.001       |
| S <sub>10</sub> | B     | 4.61  | 0.013     | 22.63        | 84.615           | 1.256          | 0.213         | 0.013    | 0.015       |
| S <sub>11</sub> | B     | 4.63  | 0.795     | 461.84       | 673.165          | 2.235          | 0.307         | 0.004    | 0.003       |
| S <sub>12</sub> | A     | 4.63  | 0.094     | -305.63      | 231.629          | 1.320          | -1.000        | -0.023   | 0.006       |
| S <sub>13</sub> | B     | 4.68  | 0.152     | 286.69       | 292.923          | 1.710          | 0.572         | 0.013    | 0.006       |
| S <sub>14</sub> | A     | 4.69  | 0.029     | -14.02       | 127.547          | 0.110          | -1.000        | -0.003   | 0.001       |
| S <sub>15</sub> | B     | 4.89  | 0.435     | 549.80       | 484.638          | 4.221          | 0.269         | 0.009    | 0.009       |
| S <sub>16</sub> | A     | 4.89  | 0.230     | -628.03      | 353.488          | 1.782          | -1.000        | -0.020   | 0.005       |

**Table S10:**  $E_g$ ,  $f_{osc}$ , Rotatory Strengths ( $R$  in erg-esu-cm/Gauss),  $|\mu|$  (in esu-cm),  $|m|$  (in erg-G<sup>-1</sup>),  $\cos \theta$ ,  $g_{CD}$ , and  $|m|/|\mu|$  values of the first sixteen excited states of *cis*-(BPY)<sub>4</sub> for three conformers obtained at RI-ADC(2)/def2-TZVPD level

| <b><i>o</i>-</b> |       |       |           |              |                  |                |               |          |             |
|------------------|-------|-------|-----------|--------------|------------------|----------------|---------------|----------|-------------|
| State            | irrep | $E_g$ | $f_{osc}$ | $R/10^{-40}$ | $ \mu /10^{-20}$ | $ m /10^{-20}$ | $\cos \theta$ | $g_{CD}$ | $ m / \mu $ |
| S <sub>1</sub>   | A     | 4.02  | 0.000     | 0.74         | 13.041           | 0.057          | 1.000         | 0.017    | 0.004       |
| S <sub>2</sub>   | B     | 4.02  | 0.000     | 0.63         | 6.979            | 0.228          | 0.395         | 0.052    | 0.033       |
| S <sub>3</sub>   | A     | 4.24  | 0.001     | -1.45        | 22.833           | 0.063          | -1.000        | -0.011   | 0.003       |
| S <sub>4</sub>   | B     | 4.24  | 0.000     | -4.69        | 16.672           | 0.327          | -0.861        | -0.068   | 0.020       |
| S <sub>5</sub>   | A     | 4.34  | 0.000     | 4.41         | 17.004           | 0.260          | 1.000         | 0.061    | 0.015       |
| S <sub>6</sub>   | B     | 4.35  | 0.003     | 9.36         | 39.451           | 0.478          | 0.496         | 0.024    | 0.012       |
| S <sub>7</sub>   | A     | 4.38  | 0.000     | 0.75         | 14.946           | 0.050          | 1.000         | 0.013    | 0.003       |
| S <sub>8</sub>   | A     | 4.40  | 0.001     | 2.95         | 19.019           | 0.155          | 1.000         | 0.033    | 0.008       |
| S <sub>9</sub>   | B     | 4.40  | 0.002     | -25.55       | 35.812           | 0.729          | -0.979        | -0.080   | 0.020       |
| S <sub>10</sub>  | B     | 4.46  | 0.000     | -10.39       | 16.733           | 0.643          | -0.966        | -0.148   | 0.038       |
| S <sub>11</sub>  | A     | 4.48  | 0.002     | -25.68       | 33.354           | 0.770          | -1.000        | -0.092   | 0.023       |
| S <sub>12</sub>  | B     | 4.49  | 0.005     | -5.41        | 53.307           | 0.250          | -0.406        | -0.008   | 0.005       |
| S <sub>13</sub>  | A     | 4.56  | 0.102     | -316.42      | 243.441          | 1.300          | -1.000        | -0.021   | 0.005       |
| S <sub>14</sub>  | B     | 4.56  | 0.031     | 368.34       | 134.373          | 3.538          | 0.775         | 0.082    | 0.026       |
| S <sub>15</sub>  | A     | 4.57  | 0.054     | -187.12      | 175.980          | 1.063          | -1.000        | -0.024   | 0.006       |
| S <sub>16</sub>  | B     | 4.59  | 0.051     | 356.53       | 171.450          | 3.094          | 0.672         | 0.049    | 0.018       |
| <b><i>m</i>-</b> |       |       |           |              |                  |                |               |          |             |
| S <sub>1</sub>   | B     | 4.08  | 3.128     | -324.94      | 1422.290         | 1.683          | -0.136        | -0.001   | 0.001       |
| S <sub>2</sub>   | A     | 4.17  | 0.004     | -13.595      | 51.910           | 0.262          | -1.000        | -0.020   | 0.005       |
| S <sub>3</sub>   | B     | 4.18  | 0.128     | -12.36       | 284.552          | 0.449          | -0.097        | -0.001   | 0.002       |
| S <sub>4</sub>   | A     | 4.28  | 0.005     | 22.26        | 55.848           | 0.399          | 1.000         | 0.029    | 0.007       |
| S <sub>5</sub>   | B     | 4.31  | 0.064     | 19.32        | 198.506          | 0.364          | 0.267         | 0.002    | 0.002       |
| S <sub>6</sub>   | A     | 4.37  | 0.007     | 4.46         | 66.594           | 0.067          | 1.000         | 0.004    | 0.001       |
| S <sub>7</sub>   | B     | 4.42  | 0.330     | 284.18       | 443.343          | 0.986          | 0.650         | 0.006    | 0.002       |
| S <sub>8</sub>   | A     | 4.48  | 0.038     | 11.45        | 148.589          | 0.077          | 1.000         | 0.002    | 0.001       |
| S <sub>9</sub>   | B     | 4.54  | 0.009     | 38.60        | 70.826           | 0.746          | 0.731         | 0.031    | 0.011       |
| S <sub>10</sub>  | A     | 4.56  | 0.008     | -18.68       | 66.878           | 0.279          | -1.000        | -0.017   | 0.004       |
| S <sub>11</sub>  | B     | 4.70  | 0.185     | 38.01        | 322.158          | 0.880          | 0.134         | 0.002    | 0.003       |
| S <sub>12</sub>  | A     | 4.75  | 0.003     | 2.79         | 43.385           | 0.064          | 1.000         | 0.006    | 0.001       |
| S <sub>13</sub>  | A     | 4.77  | 0.000     | -0.81        | 2.366            | 0.344          | -1.000        | -0.569   | 0.145       |
| S <sub>14</sub>  | B     | 4.77  | 0.000     | 0.81         | 6.045            | 0.345          | 0.387         | 0.088    | 0.057       |
| S <sub>15</sub>  | B     | 4.77  | 0.124     | 182.06       | 262.179          | 0.766          | 0.906         | 0.011    | 0.003       |
| S <sub>16</sub>  | A     | 4.79  | 0.011     | -30.67       | 76.059           | 0.403          | -1.000        | -0.021   | 0.005       |
| <b><i>p</i>-</b> |       |       |           |              |                  |                |               |          |             |
| S <sub>1</sub>   | A     | 4.20  | 0.001     | 4.11         | 29.829           | 0.138          | 1.000         | 0.019    | 0.005       |
| S <sub>2</sub>   | B     | 4.20  | 0.004     | 21.21        | 49.720           | 0.802          | 0.532         | 0.034    | 0.016       |
| S <sub>3</sub>   | B     | 4.30  | 0.002     | 0.40         | 34.899           | 0.024          | 0.487         | 0.001    | 0.001       |
| S <sub>4</sub>   | A     | 4.31  | 0.001     | 18.05        | 27.545           | 0.655          | 1.000         | 0.095    | 0.024       |
| S <sub>5</sub>   | A     | 4.35  | 0.003     | 28.13        | 43.081           | 0.653          | 1.000         | 0.061    | 0.015       |
| S <sub>6</sub>   | B     | 4.35  | 0.017     | 41.20        | 100.048          | 0.816          | 0.505         | 0.017    | 0.008       |
| S <sub>7</sub>   | B     | 4.37  | 0.005     | 19.42        | 53.638           | 0.698          | 0.519         | 0.027    | 0.013       |
| S <sub>8</sub>   | A     | 4.42  | 0.001     | 17.96        | 23.023           | 0.780          | 1.000         | 0.135    | 0.034       |
| S <sub>9</sub>   | A     | 4.45  | 0.001     | -14.58       | 18.690           | 0.780          | -1.000        | -0.167   | 0.042       |
| S <sub>10</sub>  | B     | 4.50  | 0.021     | 46.00        | 110.008          | 1.290          | 0.324         | 0.015    | 0.012       |
| S <sub>11</sub>  | B     | 4.55  | 0.041     | -18.81       | 153.927          | 1.250          | -0.098        | -0.003   | 0.008       |
| S <sub>12</sub>  | A     | 4.65  | 0.173     | -190.09      | 313.104          | 0.607          | -1.000        | -0.008   | 0.002       |
| S <sub>13</sub>  | B     | 4.67  | 0.011     | 4.94         | 79.276           | 0.772          | 0.081         | 0.003    | 0.010       |
| S <sub>14</sub>  | A     | 4.69  | 0.003     | -9.37        | 41.180           | 0.227          | -1.000        | -0.022   | 0.006       |
| S <sub>15</sub>  | B     | 4.69  | 0.033     | -33.20       | 135.208          | 0.716          | -0.343        | -0.007   | 0.005       |
| S <sub>16</sub>  | A     | 4.71  | 0.002     | -6.18        | 30.604           | 0.202          | -1.000        | -0.026   | 0.007       |

Table S11: Excitation energies ( $E_g$ ) and oscillator strengths( $f_{osc}$ ) of three different conformers for *trans*-(BPY)<sub>4</sub> calculated at RI-ADC(2) level and using two different functionals B3LYP and CAM-B3LYP using the def2-TZVPD basis set

| <i>o</i> -      |       |           |           |           |       |           |       |       |           |
|-----------------|-------|-----------|-----------|-----------|-------|-----------|-------|-------|-----------|
|                 |       | RI-ADC(2) |           | CAM-B3LYP |       | B3LYP     |       |       |           |
| State           | Irrep | $E_g$     | $f_{osc}$ | Irrep     | $E_g$ | $f_{osc}$ | Irrep | $E_g$ | $f_{osc}$ |
| S <sub>1</sub>  | A     | 4.33      | 0.000     | A         | 4.43  | 0.000     | A     | 3.89  | 0.000     |
| S <sub>2</sub>  | B     | 4.35      | 0.001     | B         | 4.43  | 0.064     | B     | 3.89  | 0.001     |
| S <sub>3</sub>  | A     | 4.35      | 0.000     | B         | 4.47  | 1.344     | A     | 3.96  | 0.000     |
| S <sub>4</sub>  | A     | 4.36      | 0.000     | B         | 4.49  | 1.060     | B     | 3.97  | 0.015     |
| S <sub>5</sub>  | A     | 4.38      | 0.000     | A         | 4.49  | 0.000     | A     | 4.07  | 0.000     |
| S <sub>6</sub>  | A     | 4.39      | 0.000     | A         | 4.55  | 0.000     | B     | 4.09  | 0.000     |
| S <sub>7</sub>  | B     | 4.41      | 0.013     | B         | 4.59  | 0.000     | A     | 4.10  | 0.000     |
| S <sub>8</sub>  | B     | 4.46      | 2.060     | A         | 4.59  | 0.002     | B     | 4.11  | 1.741     |
| S <sub>9</sub>  | A     | 4.46      | 0.000     | B         | 4.61  | 0.000     | B     | 4.11  | 0.026     |
| S <sub>10</sub> | A     | 4.51      | 0.009     | A         | 4.61  | 0.001     | A     | 4.12  | 0.000     |
| S <sub>11</sub> | A     | 4.70      | 0.000     | A         | 4.63  | 0.007     | B     | 4.13  | 0.000     |
| S <sub>12</sub> | B     | 4.79      | 0.747     | B         | 4.65  | 0.000     | A     | 4.13  | 0.000     |
| S <sub>13</sub> | B     | 4.97      | 0.465     | A         | 4.71  | 0.000     | A     | 4.17  | 0.000     |
| S <sub>14</sub> | B     | 5.12      | 0.067     | B         | 4.76  | 0.784     | B     | 4.17  | 0.000     |
| S <sub>15</sub> | B     | 5.27      | 0.216     | A         | 4.82  | 0.000     | A     | 4.23  | 0.006     |
| S <sub>16</sub> | B     | 5.46      | 1.809     | B         | 4.84  | 0.000     | A     | 4.25  | 0.000     |
| <i>m</i> -      |       |           |           |           |       |           |       |       |           |
| S <sub>1</sub>  | B     | 3.82      | 3.795     | B         | 3.75  | 3.723     | B     | 3.22  | 2.928     |
| S <sub>2</sub>  | A     | 4.09      | 0.002     | A         | 4.16  | 0.000     | A     | 3.65  | 0.000     |
| S <sub>3</sub>  | B     | 4.17      | 0.032     | A         | 4.38  | 0.003     | A     | 3.69  | 0.000     |
| S <sub>4</sub>  | A     | 4.19      | 0.000     | B         | 4.43  | 0.011     | A     | 3.75  | 0.001     |
| S <sub>5</sub>  | A     | 4.28      | 0.001     | A         | 4.50  | 0.001     | B     | 3.82  | 0.009     |
| S <sub>6</sub>  | B     | 4.33      | 0.110     | B         | 4.53  | 0.026     | A     | 3.94  | 0.000     |
| S <sub>7</sub>  | A     | 4.50      | 0.000     | B         | 4.55  | 0.273     | B     | 4.00  | 0.157     |
| S <sub>8</sub>  | B     | 4.52      | 0.288     | A         | 4.70  | 0.000     | B     | 4.01  | 0.527     |
| S <sub>9</sub>  | A     | 4.54      | 0.000     | A         | 4.74  | 0.001     | B     | 4.03  | 0.021     |
| S <sub>10</sub> | B     | 4.57      | 0.000     | B         | 4.75  | 0.001     | B     | 4.14  | 0.001     |
| S <sub>11</sub> | A     | 4.64      | 0.000     | A         | 4.79  | 0.000     | A     | 4.19  | 0.000     |
| S <sub>12</sub> | B     | 4.64      | 0.007     | B         | 4.84  | 0.004     | A     | 4.21  | 0.000     |
| S <sub>13</sub> | A     | 4.71      | 0.001     | A         | 4.87  | 0.001     | B     | 4.26  | 0.000     |
| S <sub>14</sub> | B     | 4.72      | 0.004     | B         | 4.88  | 0.014     | B     | 4.33  | 0.001     |
| S <sub>15</sub> | B     | 4.74      | 0.120     | B         | 4.90  | 0.005     | A     | 4.33  | 0.001     |
| S <sub>16</sub> | A     | 4.76      | 0.001     | A         | 4.91  | 0.000     | A     | 4.36  | 0.001     |
| <i>p</i> -      |       |           |           |           |       |           |       |       |           |
| S <sub>1</sub>  | A     | 4.33      | 0.010     | A         | 4.52  | 0.024     | A     | 4.01  | 0.017     |
| S <sub>2</sub>  | B     | 4.33      | 0.002     | B         | 4.52  | 0.239     | B     | 4.02  | 0.005     |
| S <sub>3</sub>  | B     | 4.37      | 0.015     | B         | 4.53  | 0.166     | B     | 4.04  | 0.036     |
| S <sub>4</sub>  | A     | 4.37      | 0.000     | A         | 4.53  | 0.003     | A     | 4.04  | 0.001     |
| S <sub>5</sub>  | A     | 4.52      | 0.000     | B         | 4.56  | 1.506     | B     | 4.11  | 0.129     |
| S <sub>6</sub>  | B     | 4.52      | 0.152     | A         | 4.63  | 0.161     | A     | 4.11  | 0.014     |
| S <sub>7</sub>  | A     | 4.54      | 0.032     | A         | 4.64  | 0.121     | A     | 4.12  | 0.026     |
| S <sub>8</sub>  | B     | 4.57      | 0.282     | B         | 4.64  | 0.041     | B     | 4.15  | 0.798     |
| S <sub>9</sub>  | B     | 4.61      | 0.013     | A         | 4.71  | 0.011     | B     | 4.17  | 0.011     |
| S <sub>10</sub> | A     | 4.61      | 0.008     | B         | 4.73  | 0.012     | A     | 4.20  | 0.048     |
| S <sub>11</sub> | B     | 4.63      | 0.795     | A         | 4.78  | 0.013     | A     | 4.25  | 0.001     |
| S <sub>12</sub> | A     | 4.63      | 0.094     | B         | 4.80  | 0.065     | B     | 4.28  | 0.042     |
| S <sub>13</sub> | B     | 4.68      | 0.152     | B         | 4.84  | 0.027     | B     | 4.31  | 0.088     |
| S <sub>14</sub> | A     | 4.69      | 0.029     | A         | 4.84  | 0.009     | A     | 4.31  | 0.030     |
| S <sub>15</sub> | B     | 4.89      | 0.435     | B         | 4.91  | 0.171     | B     | 4.37  | 0.112     |
| S <sub>16</sub> | A     | 4.89      | 0.230     | A         | 4.91  | 0.099     | A     | 4.38  | 0.000     |

Table S12: Excitation energies ( $E_g$ ) and oscillator strengths( $f_{osc}$ ) for three different conformers of *cis*-(BPY)<sub>4</sub> calculated at RI-ADC(2) level and using two different functionals B3LYP and CAM-B3LYP using the def2-TZVPD basis set

| <i>o</i> -      |       |           |           |       |       |           |       |       |           |
|-----------------|-------|-----------|-----------|-------|-------|-----------|-------|-------|-----------|
| RI-ADC(2)       |       | CAM-B3LYP |           |       |       | B3LYP     |       |       |           |
| State           | Irrep | $E_g$     | $f_{osc}$ | Irrep | $E_g$ | $f_{osc}$ | Irrep | $E_g$ | $f_{osc}$ |
| S <sub>1</sub>  | B     | 4.02      | 0.000     | B     | 4.36  | 0.000     | B     | 3.90  | 0.000     |
| S <sub>2</sub>  | A     | 4.02      | 0.000     | A     | 4.36  | 0.001     | A     | 3.91  | 0.000     |
| S <sub>3</sub>  | B     | 4.24      | 0.000     | A     | 4.56  | 0.000     | A     | 4.09  | 0.001     |
| S <sub>4</sub>  | A     | 4.25      | 0.001     | B     | 4.57  | 0.001     | B     | 4.09  | 0.000     |
| S <sub>5</sub>  | A     | 4.34      | 0.000     | B     | 4.61  | 0.005     | B     | 4.16  | 0.036     |
| S <sub>6</sub>  | B     | 4.35      | 0.003     | A     | 4.62  | 0.000     | A     | 4.17  | 0.003     |
| S <sub>7</sub>  | A     | 4.38      | 0.000     | A     | 4.62  | 0.001     | A     | 4.18  | 0.006     |
| S <sub>8</sub>  | B     | 4.40      | 0.002     | B     | 4.65  | 0.013     | B     | 4.18  | 0.009     |
| S <sub>9</sub>  | A     | 4.40      | 0.001     | A     | 4.66  | 0.020     | A     | 4.19  | 0.017     |
| S <sub>10</sub> | B     | 4.46      | 0.000     | B     | 4.67  | 0.002     | B     | 4.20  | 0.017     |
| S <sub>11</sub> | A     | 4.48      | 0.002     | B     | 4.70  | 0.065     | B     | 4.23  | 0.028     |
| S <sub>12</sub> | B     | 4.49      | 0.005     | A     | 4.71  | 0.172     | A     | 4.27  | 0.002     |
| S <sub>13</sub> | A     | 4.56      | 0.102     | A     | 4.78  | 0.003     | A     | 4.27  | 0.001     |
| S <sub>14</sub> | B     | 4.56      | 0.031     | B     | 4.78  | 0.013     | B     | 4.29  | 0.004     |
| S <sub>15</sub> | A     | 4.57      | 0.054     | A     | 4.88  | 0.026     | A     | 4.29  | 0.000     |
| S <sub>16</sub> | B     | 4.59      | 0.051     | B     | 4.89  | 0.011     | B     | 4.34  | 0.025     |
| <i>m</i> -      |       |           |           |       |       |           |       |       |           |
| S <sub>1</sub>  | B     | 4.08      | 3.128     | B     | 4.03  | 3.497     | B     | 3.50  | 2.670     |
| S <sub>2</sub>  | A     | 4.17      | 0.004     | A     | 4.37  | 0.050     | A     | 3.80  | 0.015     |
| S <sub>3</sub>  | B     | 4.18      | 0.128     | B     | 4.46  | 0.022     | B     | 3.87  | 0.015     |
| S <sub>4</sub>  | A     | 4.28      | 0.005     | A     | 4.47  | 0.005     | A     | 3.91  | 0.023     |
| S <sub>5</sub>  | B     | 4.31      | 0.064     | B     | 4.55  | 0.002     | A     | 3.99  | 0.000     |
| S <sub>6</sub>  | A     | 4.37      | 0.007     | A     | 4.57  | 0.007     | B     | 3.99  | 0.000     |
| S <sub>7</sub>  | B     | 4.42      | 0.330     | A     | 4.66  | 0.003     | A     | 4.01  | 0.007     |
| S <sub>8</sub>  | A     | 4.48      | 0.038     | B     | 4.67  | 0.077     | A     | 4.09  | 0.002     |
| S <sub>9</sub>  | B     | 4.54      | 0.009     | B     | 4.72  | 0.010     | B     | 4.11  | 0.005     |
| S <sub>10</sub> | A     | 4.56      | 0.008     | A     | 4.73  | 0.001     | B     | 4.19  | 0.094     |
| S <sub>11</sub> | B     | 4.70      | 0.185     | B     | 4.79  | 0.200     | A     | 4.20  | 0.000     |
| S <sub>12</sub> | A     | 4.75      | 0.003     | A     | 4.91  | 0.004     | B     | 4.23  | 0.546     |
| S <sub>13</sub> | B     | 4.77      | 0.000     | B     | 4.94  | 0.008     | B     | 4.28  | 0.009     |
| S <sub>14</sub> | A     | 4.77      | 0.000     | A     | 4.96  | 0.000     | B     | 4.37  | 0.005     |
| S <sub>15</sub> | B     | 4.77      | 0.124     | B     | 4.96  | 0.008     | A     | 4.48  | 0.005     |
| S <sub>16</sub> | A     | 4.80      | 0.011     | A     | 4.98  | 0.006     | B     | 4.48  | 0.028     |
| <i>p</i> -      |       |           |           |       |       |           |       |       |           |
| S <sub>1</sub>  | B     | 4.20      | 0.004     | A     | 4.56  | 0.002     | A     | 3.92  | 0.001     |
| S <sub>2</sub>  | A     | 4.20      | 0.001     | B     | 4.57  | 0.004     | B     | 3.94  | 0.012     |
| S <sub>3</sub>  | B     | 4.30      | 0.002     | B     | 4.59  | 0.003     | B     | 4.00  | 0.000     |
| S <sub>4</sub>  | A     | 4.31      | 0.001     | A     | 4.60  | 0.000     | A     | 4.03  | 0.001     |
| S <sub>5</sub>  | A     | 4.35      | 0.003     | A     | 4.62  | 0.003     | B     | 4.04  | 0.006     |
| S <sub>6</sub>  | B     | 4.35      | 0.017     | B     | 4.63  | 0.009     | A     | 4.08  | 0.002     |
| S <sub>7</sub>  | B     | 4.37      | 0.005     | B     | 4.64  | 0.024     | B     | 4.08  | 0.002     |
| S <sub>8</sub>  | A     | 4.42      | 0.001     | A     | 4.66  | 0.007     | B     | 4.13  | 0.013     |
| S <sub>9</sub>  | A     | 4.45      | 0.001     | A     | 4.69  | 0.001     | A     | 4.13  | 0.003     |
| S <sub>10</sub> | B     | 4.50      | 0.021     | B     | 4.72  | 0.003     | B     | 4.15  | 0.006     |
| S <sub>11</sub> | B     | 4.55      | 0.041     | B     | 4.78  | 0.085     | A     | 4.15  | 0.001     |
| S <sub>12</sub> | A     | 4.65      | 0.173     | A     | 4.86  | 0.264     | A     | 4.17  | 0.001     |
| S <sub>13</sub> | B     | 4.67      | 0.011     | B     | 4.92  | 0.041     | B     | 4.25  | 0.005     |
| S <sub>14</sub> | A     | 4.69      | 0.003     | A     | 4.97  | 0.029     | B     | 4.29  | 0.002     |
| S <sub>15</sub> | B     | 4.70      | 0.033     | B     | 5.01  | 0.004     | A     | 4.32  | 0.103     |
| S <sub>16</sub> | A     | 4.71      | 0.002     | A     | 5.01  | 0.008     | A     | 4.34  | 0.000     |

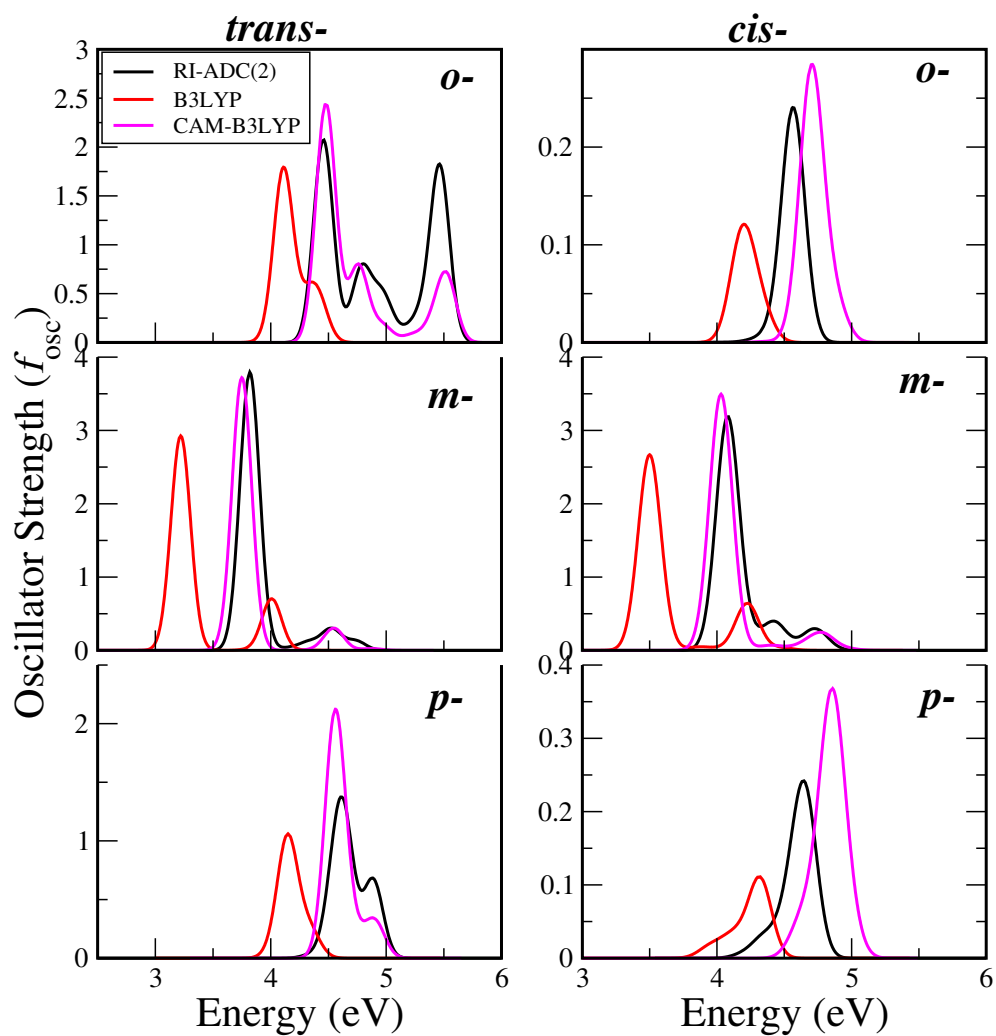

Figure S3: Absorption spectra of *o*-, *m*-, and *p*- conformers for *trans*- and *cis*-(BPY)<sub>4</sub> obtained at RI-ADC(2) level and using two different functionals B3LYP and CAM-B3LYP using the def2-TZVPD basis set



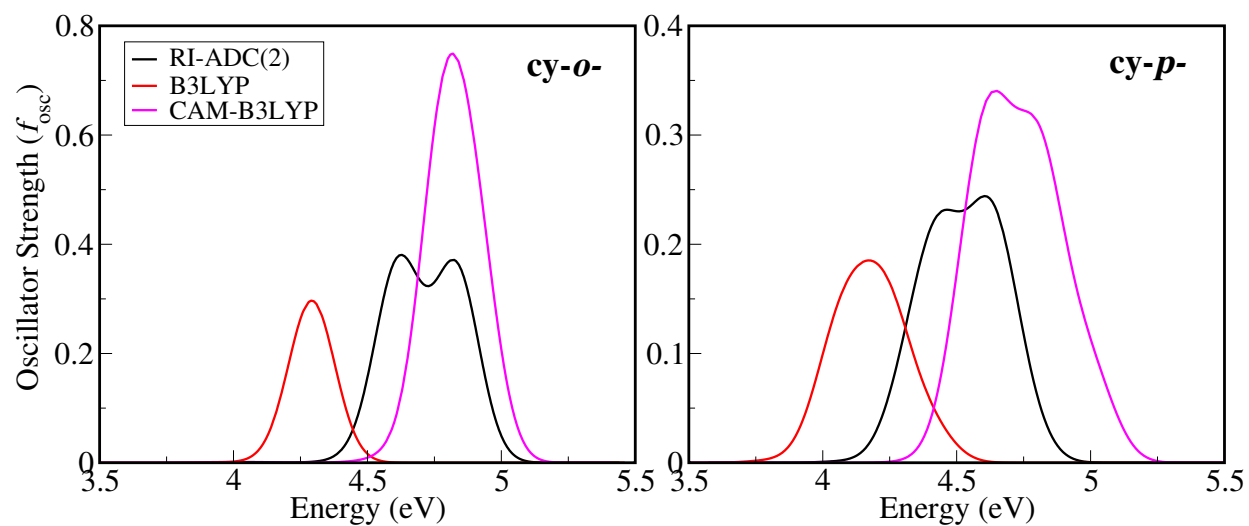

Figure S4: Absorption spectra of **cy-o-** and **cy-p-** obtained at RI-ADC(2) level and using two different functionals B3LYP and CAM-B3LYP using the def2-TZVPD basis set

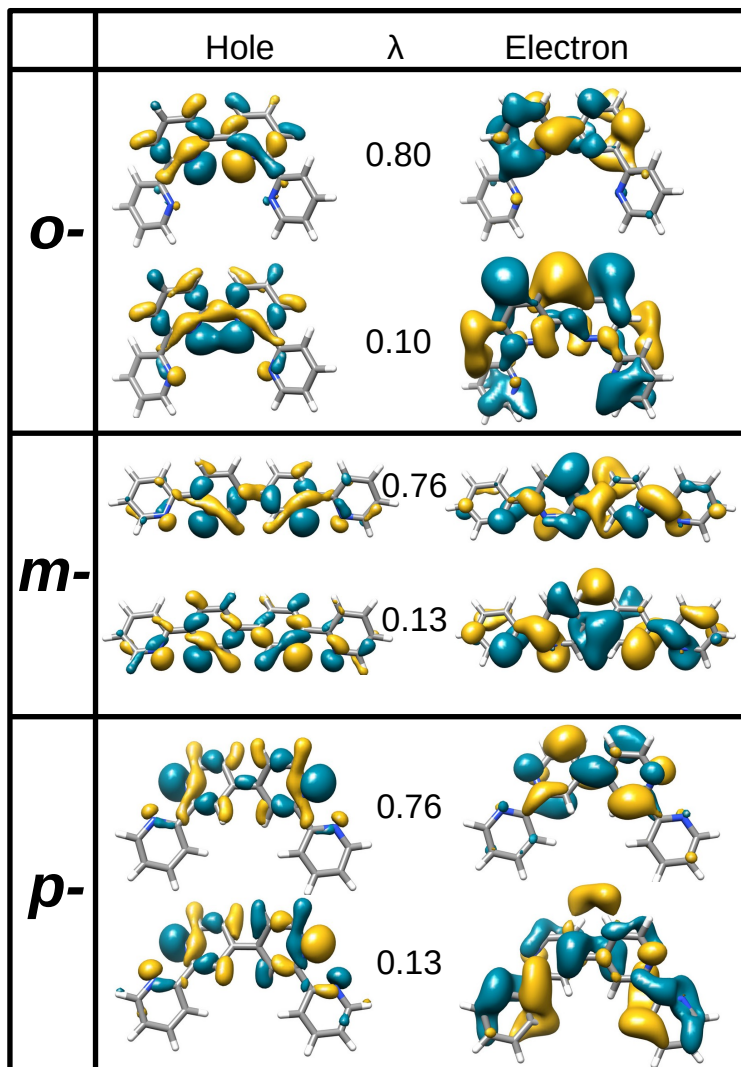

Figure S5: Natural transition orbitals corresponding to the  $S_1$  states of three different conformers of *cis*-(BPY)<sub>2</sub>. Here,  $\lambda$  value represents the weight of a configuration.

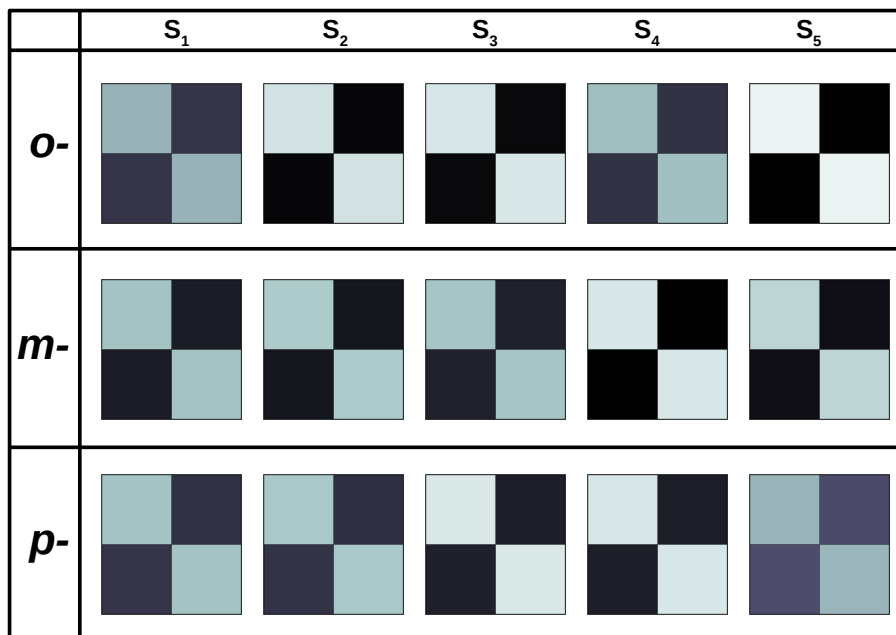

Figure S6: *e-h* correlation plots corresponding to the first five excited states of *cis*-(BPY)<sub>2</sub> for three different conformers.

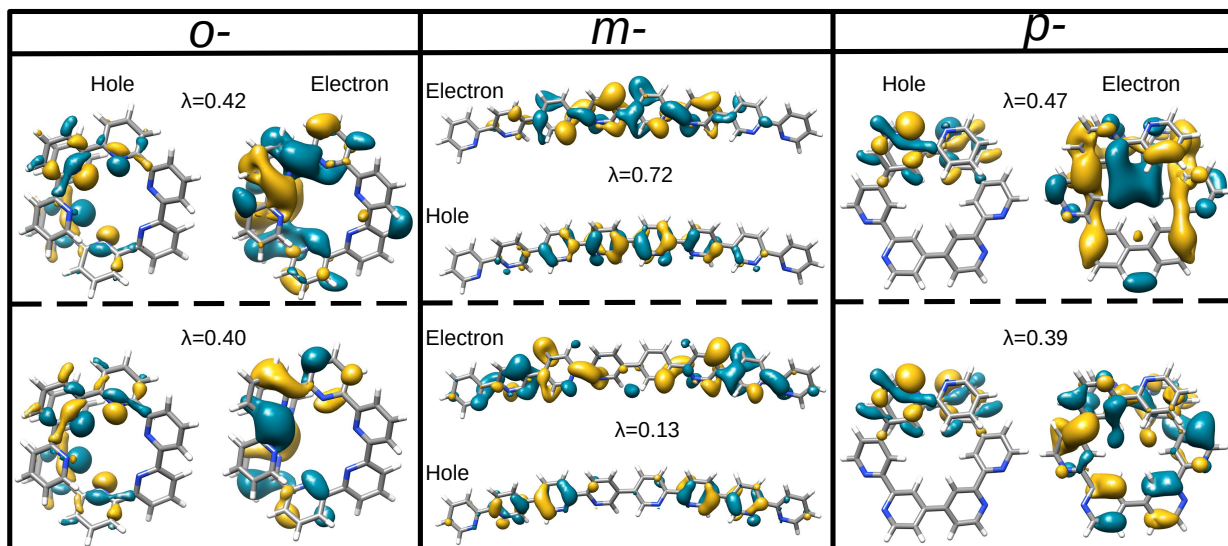

Figure S7: Natural transition orbitals corresponding to the  $S_1$  states of three different conformers of *cis*-(BPY)<sub>4</sub>. Here,  $\lambda$  value represents the weight of a configuration.

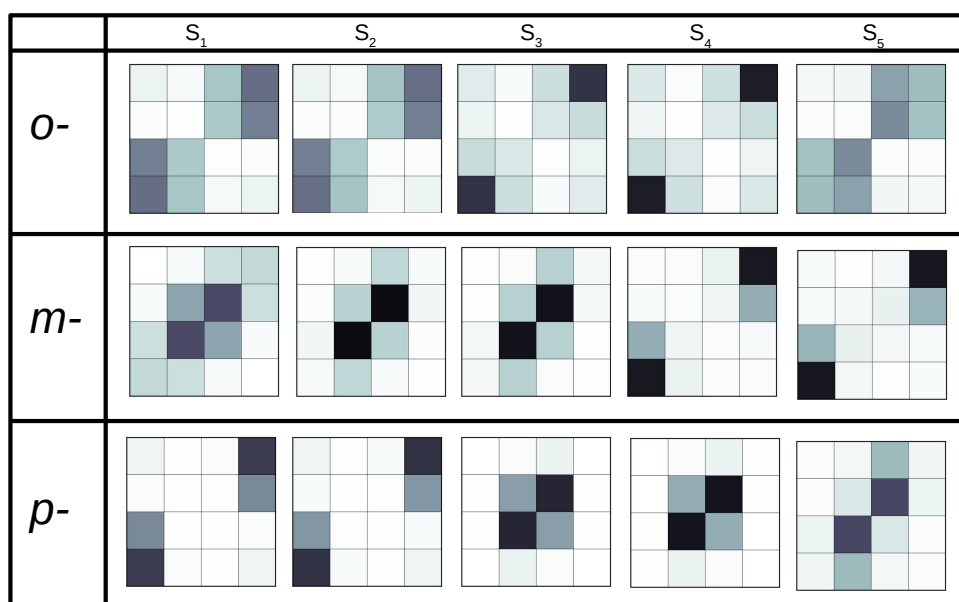

Figure S8:  $e-h$  correlation plots corresponding to the first five excited states of  $cis-(BPY)_4$  for three different conformers.

**Table S13:** Excitation energies ( $E_g$ ), oscillator strengths( $f_{osc}$ ), and  $\omega_{CT}$  values of first five states of three different conformers of *trans*-(BPY)<sub>4</sub> calculated at RI-ADC(2) level and using two different functionals B3LYP and CAM-B3LYP using the def2-TZVPD basis set

| <i>o-</i>      |           |           |               |           |           |               |       |           |               |
|----------------|-----------|-----------|---------------|-----------|-----------|---------------|-------|-----------|---------------|
| State          | RI-ADC(2) |           |               | CAM-B3LYP |           |               | B3LYP |           |               |
|                | $E_g$     | $f_{osc}$ | $\omega_{CT}$ | $E_g$     | $f_{osc}$ | $\omega_{CT}$ | $E_g$ | $f_{osc}$ | $\omega_{CT}$ |
| S <sub>1</sub> | 4.33      | 0.000     | 0.33          | 4.43      | 0.000     | 0.25          | 3.89  | 0.000     | 0.60          |
| S <sub>2</sub> | 4.35      | 0.001     | 0.44          | 4.43      | 0.064     | 0.35          | 3.89  | 0.001     | 0.58          |
| S <sub>3</sub> | 4.35      | 0.000     | 0.41          | 4.47      | 1.344     | 0.25          | 3.96  | 0.000     | 0.56          |
| S <sub>4</sub> | 4.36      | 0.000     | 0.33          | 4.49      | 1.060     | 0.27          | 3.97  | 0.015     | 0.55          |
| S <sub>5</sub> | 4.38      | 0.000     | 0.42          | 4.49      | 0.000     | 0.33          | 4.07  | 0.000     | 0.53          |
| <i>m-</i>      |           |           |               |           |           |               |       |           |               |
| S <sub>1</sub> | 3.82      | 3.795     | 0.44          | 3.75      | 3.723     | 0.38          | 3.22  | 2.928     | 0.60          |
| S <sub>2</sub> | 4.09      | 0.002     | 0.30          | 4.16      | 0.000     | 0.34          | 3.65  | 0.000     | 0.69          |
| S <sub>3</sub> | 4.17      | 0.032     | 0.27          | 4.38      | 0.003     | 0.17          | 3.69  | 0.000     | 0.76          |
| S <sub>4</sub> | 4.19      | 0.000     | 0.38          | 4.43      | 0.011     | 0.14          | 3.75  | 0.001     | 0.38          |
| S <sub>5</sub> | 4.28      | 0.001     | 0.29          | 4.50      | 0.001     | 0.10          | 3.82  | 0.009     | 0.36          |
| <i>p-</i>      |           |           |               |           |           |               |       |           |               |
| S <sub>1</sub> | 4.33      | 0.010     | 0.19          | 4.52      | 0.024     | 0.11          | 4.01  | 0.017     | 0.25          |
| S <sub>2</sub> | 4.33      | 0.002     | 0.19          | 4.52      | 0.239     | 0.10          | 4.02  | 0.005     | 0.24          |
| S <sub>3</sub> | 4.37      | 0.015     | 0.19          | 4.53      | 0.166     | 0.09          | 4.04  | 0.036     | 0.20          |
| S <sub>4</sub> | 4.37      | 0.000     | 0.18          | 4.53      | 0.003     | 0.08          | 4.04  | 0.001     | 0.19          |
| S <sub>5</sub> | 4.52      | 0.000     | 0.47          | 4.56      | 1.506     | 0.12          | 4.11  | 0.129     | 0.51          |

Table S14: Excitation energies ( $E_g$ ), oscillator strengths( $f_{osc}$ ), and  $\omega_{CT}$  values of first five states of three different conformers of *cis*-(BPY)<sub>4</sub> calculated at RI-ADC(2) level and using two different functionals B3LYP and CAM-B3LYP using the def2-TZVPD basis set

| <b><i>o</i>-</b> |           |           |               |           |           |               |       |           |               |
|------------------|-----------|-----------|---------------|-----------|-----------|---------------|-------|-----------|---------------|
|                  | RI-ADC(2) |           |               | CAM-B3LYP |           |               | B3LYP |           |               |
| State            | $E_g$     | $f_{osc}$ | $\omega_{CT}$ | $E_g$     | $f_{osc}$ | $\omega_{CT}$ | $E_g$ | $f_{osc}$ | $\omega_{CT}$ |
| S <sub>1</sub>   | 4.02      | 0.000     | 0.52          | 4.36      | 0.000     | 0.30          | 3.90  | 0.000     | 0.42          |
| S <sub>2</sub>   | 4.02      | 0.000     | 0.53          | 4.36      | 0.001     | 0.30          | 3.91  | 0.000     | 0.42          |
| S <sub>3</sub>   | 4.24      | 0.000     | 0.36          | 4.56      | 0.000     | 0.10          | 4.09  | 0.001     | 0.17          |
| S <sub>4</sub>   | 4.25      | 0.001     | 0.33          | 4.57      | 0.001     | 0.10          | 4.09  | 0.000     | 0.15          |
| S <sub>5</sub>   | 4.34      | 0.000     | 0.51          | 4.61      | 0.005     | 0.19          | 4.16  | 0.036     | 0.49          |
| <b><i>m</i>-</b> |           |           |               |           |           |               |       |           |               |
| S <sub>1</sub>   | 4.08      | 3.128     | 0.46          | 4.03      | 3.497     | 0.38          | 3.50  | 2.670     | 0.57          |
| S <sub>2</sub>   | 4.17      | 0.004     | 0.33          | 4.37      | 0.050     | 0.30          | 3.80  | 0.015     | 0.48          |
| S <sub>3</sub>   | 4.18      | 0.128     | 0.34          | 4.46      | 0.022     | 0.16          | 3.87  | 0.015     | 0.32          |
| S <sub>4</sub>   | 4.28      | 0.005     | 0.34          | 4.47      | 0.005     | 0.17          | 3.91  | 0.023     | 0.46          |
| S <sub>5</sub>   | 4.31      | 0.064     | 0.32          | 4.55      | 0.002     | 0.11          | 3.99  | 0.000     | 0.77          |
| <b><i>p</i>-</b> |           |           |               |           |           |               |       |           |               |
| S <sub>1</sub>   | 4.20      | 0.004     | 0.42          | 4.56      | 0.002     | 0.18          | 3.92  | 0.001     | 0.72          |
| S <sub>2</sub>   | 4.20      | 0.001     | 0.40          | 4.57      | 0.004     | 0.18          | 3.94  | 0.012     | 0.88          |
| S <sub>3</sub>   | 4.30      | 0.002     | 0.36          | 4.59      | 0.003     | 0.17          | 4.00  | 0.000     | 0.43          |
| S <sub>4</sub>   | 4.31      | 0.001     | 0.32          | 4.60      | 0.000     | 0.20          | 4.03  | 0.001     | 0.36          |
| S <sub>5</sub>   | 4.35      | 0.003     | 0.42          | 4.62      | 0.003     | 0.28          | 4.04  | 0.006     | 0.41          |

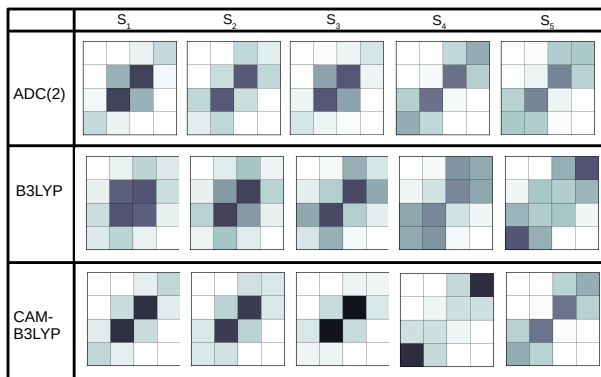

Figure S9:  $e-h$  correlation plots obtained using the RI-ADC(2) method, and B3LYP and CAM-B3LYP functionals for the first five excited states of *o-trans*-(BPY)<sub>4</sub>

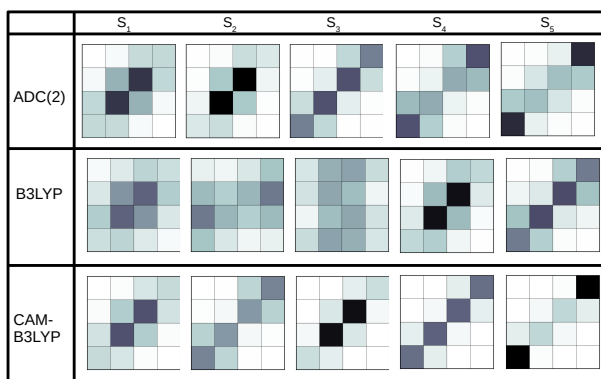

Figure S10:  $e-h$  correlation plots obtained using the RI-ADC(2) method, and B3LYP and CAM-B3LYP functionals for the first five excited states of *m-trans*-(BPY)<sub>4</sub>

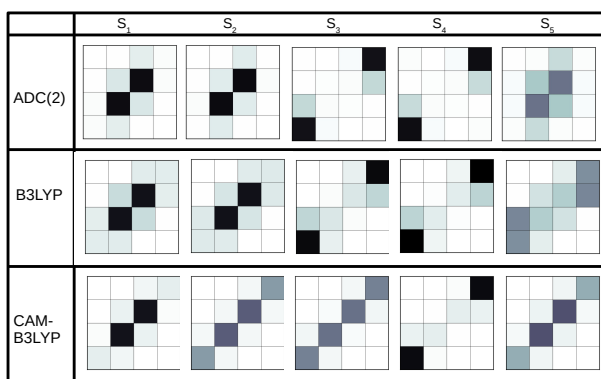

Figure S11:  $e-h$  correlation plots obtained using the RI-ADC(2) method, and B3LYP and CAM-B3LYP functionals for the first five excited states of *p-trans*-(BPY)<sub>4</sub>

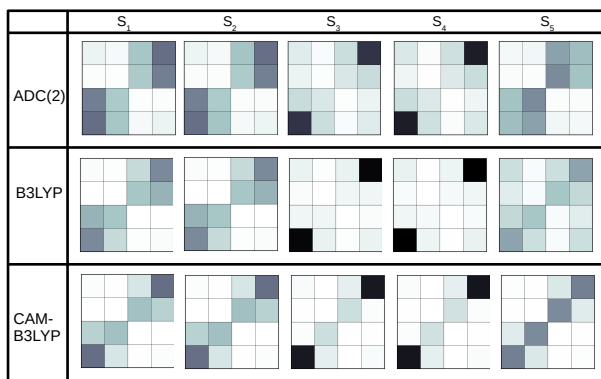

Figure S12:  $e-h$  correlation plots obtained using the RI-ADC(2) method, and B3LYP and CAM-B3LYP functionals for the first five excited states of *o-cis*-(BPY)<sub>4</sub>

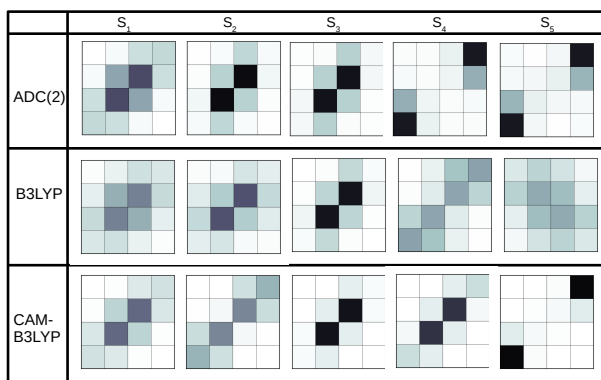

Figure S13:  $e-h$  correlation plots obtained using the RI-ADC(2) method, and B3LYP and CAM-B3LYP functionals for the first five excited states of *m-cis*-(BPY)<sub>4</sub>



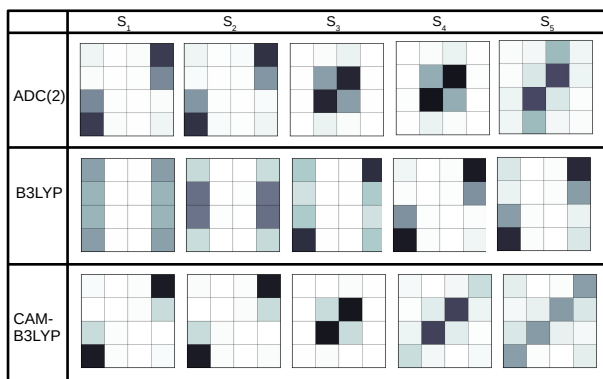

Figure S14:  $e-h$  correlation plots obtained using the RI-ADC(2) method, and B3LYP and CAM-B3LYP functionals for the first five excited states of *p-cis*-(BPY)<sub>4</sub>
